# Supplementary material
Source: PubMed Central journal article supplement (PMC4000786)
Supplement: 1319441111_pnas.201319441SI.pdf [file 1319441111_pnas.201319441SI.pdf]

# Supporting Information

Geng et al. 10.1073/pnas.1319441111

## SI Text

### 1. Discussion

**1.1.  $\delta^{15}\text{N}$  of  $\text{NO}_x$  and Atmospheric Nitrate.**  $\text{NO}_x$  is mainly produced from combustion and biogenic processes. Before the Industrial Revolution, soil biogenic emissions, biomass burning, and lightning were the dominant  $\text{NO}_x$  sources. These are referred to as natural sources. After the Industrial Revolution, human activities started to dominate  $\text{NO}_x$  emissions mainly through fossil fuel combustion (1). Human activities have also altered the properties of agricultural soil by adding synthesized nitrogen fertilizer. In this research,  $\text{NO}_x$  emitted from *N*-fertilized soil is considered to be anthropogenic in origin.

The values of  $\delta^{15}\text{N}(\text{NO}_x)$  from different sources are listed in Table S1.  $\text{NO}_x$  emitted from *N*-fertilized and unfertilized soil possesses negative  $\delta^{15}\text{N}$ , which is expected because  $\text{NO}_x$  produced in soil is through biogenic denitrification processes that preferentially consume  $^{14}\text{N}$  (2). Biomass burning produces  $\text{NO}_x$  primarily through the oxidation of nitrogen contained in biomass (fuel  $\text{NO}_x$ ), as the temperature of biomass burning is not high enough to convert atmospheric  $\text{N}_2$  and  $\text{O}_2$  to  $\text{NO}_x$  (thermal  $\text{NO}_x$ ) (3). Therefore,  $\delta^{15}\text{N}(\text{NO}_x)$  from biomass burning is determined by the  $^{15}\text{N}$  abundance of the biomass, and was predicted to be negative (4) as *N*-nutrition from nitrification possesses negative  $\delta^{15}\text{N}$  values ( $-10\text{‰}$  to  $-7\text{‰}$ ) (5).

$\text{NO}_x$  produced from fossil fuel combustion contains both fuel  $\text{NO}_x$  and thermal  $\text{NO}_x$  (6). The values of  $\delta^{15}\text{N}$  are thus determined by the abundance of  $^{15}\text{N}$  in fossil fuel, and the combustion temperature. Therefore,  $\delta^{15}\text{N}(\text{NO}_x)$  from fossil fuel combustion is difficult to predict, as  $^{15}\text{N}$  in fuel may vary geographically and the combustion temperature also varies. Existing measurements reported  $\delta^{15}\text{N}(\text{NO}_x)$  varying from  $-19\text{‰}$  to  $26\text{‰}$ , but most often reported positive  $\delta^{15}\text{N}(\text{NO}_x)$  values (Table S1 and references therein).

Although large uncertainties exist, in part due to the incomplete collection of  $\text{NO}_x$  during sampling processes, available data (Table S1) generally suggest  $\delta^{15}\text{N}(\text{NO}_x)$  from fossil fuel combustion is higher than that from natural sources. In addition, measurements of  $\delta^{15}\text{N}$  from atmospheric  $\text{NO}_x$  and nitrate, which reflects a combination of fossil fuel and natural sources, indicate higher  $\delta^{15}\text{N}$  in areas with more fossil fuel combustion compared with relatively pristine regions (e.g., refs. 6–9). Therefore, fossil fuel combustion most likely produces  $\text{NO}_x$  with higher  $\delta^{15}\text{N}$  than natural sources.

**1.2.  $\text{NO}_x$  from Fossil Fuel Combustion and *N*-Fertilized Soil.** To further examine whether or not  $\text{NO}_x$  source change (additional fossil fuel combustion emissions and *N*-fertilized soil emissions) could cause the decrease in ice core  $\delta^{15}\text{N}(\text{NO}_3^-)$ , based on our ice core data reported in this work, we calculated the  $\delta^{15}\text{N}$  value of  $\text{NO}_x$  derived from fossil fuel combustion following Hastings et al. (10), and calculated the contribution of *N*-fertilized soil  $\text{NO}_x$  to Greenland ice core nitrate following Felix et al. (11).

Greenland nitrate concentrations in the present day are about double those in the preindustrial period. The additional nitrate is mainly from two anthropogenic sources, fossil fuel combustion and *N*-fertilized soil. Assuming that there is no nitrogen fractionation from the source ( $\text{NO}_x$ ) to sink (nitrate in ice core), given the measured value of  $\delta^{15}\text{N}(\text{NO}_x)$  from *N*-fertilized soil ( $-48.9\text{‰}$  to  $-19.9\text{‰}$ , Table S1), the value of  $\delta^{15}\text{N}(\text{NO}_x)$  from fossil fuel combustion can be calculated assuming mass balance:

$$C_{\text{PD}} \times \delta^{15}\text{N}_{\text{PD}} = C_{\text{PI}} \times \delta^{15}\text{N}_{\text{PI}} + C_{\text{FF}} \times \delta^{15}\text{N}_{\text{FF}} + C_{\text{NS}} \times \delta^{15}\text{N}_{\text{NS}} \quad [\text{S1}]$$

$$C_{\text{PD}} - C_{\text{PI}} = C_{\text{FF}} + C_{\text{NS}}, \quad [\text{S2}]$$

where  $C_{\text{PD}}$  and  $\delta^{15}\text{N}_{\text{PD}}$  are the average concentration ( $129.6\text{ }\mu\text{g L}^{-1}$ ) and  $\delta^{15}\text{N}$  ( $-1.0\text{‰}$ ) of nitrate in the present day (using the post-1970 averages);  $C_{\text{PI}}$  and  $\delta^{15}\text{N}_{\text{PI}}$  are the average concentration ( $58.2\text{ }\mu\text{g L}^{-1}$ ) and  $\delta^{15}\text{N}$  ( $13.4\text{‰}$ ) of nitrate in preindustrial period (using the pre-1850 averages);  $C_{\text{FF}}$  and  $\delta^{15}\text{N}_{\text{FF}}$  are the concentration and  $\delta^{15}\text{N}$  of nitrate originating from fossil fuel combustion;  $C_{\text{NS}}$  and  $\delta^{15}\text{N}_{\text{NS}}$  are the concentration and  $\delta^{15}\text{N}$  of nitrate originating from *N*-fertilized soil. The ratio of  $C_{\text{FF}}$  to  $C_{\text{NS}}$  (i.e., the relative contributions of fossil fuel combustion and *N*-fertilized soil emission to Greenland ice core nitrate) can be estimated from the present day contributions of fossil fuel combustion and *N*-fertilized soil to global  $\text{NO}_x$  inventory ( $25.6\text{ TgN y}^{-1}$  vs.  $2.5\text{--}4.5\text{ TgN y}^{-1}$ ) (1).

Combining Eqs. S1 and S2 to solve for  $\delta^{15}\text{N}_{\text{FF}}$  yields  $\delta^{15}\text{N}_{\text{FF}}$  of  $-12.8\text{‰}$  or  $-9.8\text{‰}$  respective to a  $\delta^{15}\text{N}_{\text{NS}}$  value of  $-19.9\text{‰}$  or  $-48.9\text{‰}$ . This result is much lower than most of the measured  $\delta^{15}\text{N}(\text{NO}_x)$  from fossil fuel combustion (Table S1), and is  $\sim 23\text{‰}$  lower than the pre-1850  $\delta^{15}\text{N}(\text{NO}_3^-)$  average of  $13.4\text{‰}$  [also  $23\text{‰}$  lower than  $\delta^{15}\text{N}$  of  $\text{NO}_x$  from natural sources, assuming that pre-1850 ice core  $\delta^{15}\text{N}(\text{NO}_3^-)$  represents  $\delta^{15}\text{N}$  signal of natural  $\text{NO}_x$  source (10–12)]. Therefore, this calculation confirms that  $\text{NO}_x$  emissions from fossil fuel combustion is not responsible for the observed decrease in  $\delta^{15}\text{N}(\text{NO}_3^-)$ .

*N*-fertilized soil produces  $\text{NO}_x$  with very low  $\delta^{15}\text{N}$  values (Table S1), so if *N*-fertilized soil had contributed significant  $\text{NO}_x$  to the Greenland nitrate [two to four times higher than that predicted from  $\text{NO}_x$  inventories, suggested by Felix et al. (11)], it would probably account for the observed decrease in  $\delta^{15}\text{N}(\text{NO}_3^-)$ . Following the idea of the “two end-member mixing model” (11), but involving ice core nitrate concentration record for a better constraint, we assumed  $\delta^{15}\text{N}_{\text{FF}} = \delta^{15}\text{N}_{\text{PI}}$  in Eqs. S1 and S2 and then solved the two unknowns  $C_{\text{FF}}$  and  $C_{\text{NS}}$  by varying  $\delta^{15}\text{N}_{\text{NS}}$  from  $-20\text{‰}$ ,  $-27\text{‰}$  to  $-49\text{‰}$  following Felix et al. (11). As a result, we found  $\text{NO}_x$  from *N*-fertilized soil should have contributed 43.2%, 35.7%, and 23.2% ( $C_{\text{NS}}/C_{\text{PD}}$ ), respective to different  $\delta^{15}\text{N}_{\text{NS}}$  values, to Greenland ice core nitrate after 1970 Christian Era (C.E.) to explain the observed decrease in  $\delta^{15}\text{N}(\text{NO}_3^-)$  from 1850 to 1970. This result is similar to the result from Felix et al. (11). Relatively, the respective (to different  $\delta^{15}\text{N}_{\text{NS}}$  values) contribution of  $\text{NO}_x$  from fossil fuel combustion to Greenland ice core nitrate after 1970 was calculated ( $C_{\text{FF}}/C_{\text{PD}}$ ) to be 11.9%, 19.4%, and 31.9%. So,  $\text{NO}_x$  from fossil fuel combustion and that from *N*-fertilized soil together contribute  $\sim 55.1\%$  of Greenland ice core nitrate after 1970, consistent with the ice core nitrate concentration record that shows a slightly over two times increase in nitrate concentration from 1890 to 1970 (Figs. 1 and 2C). The ratio of the contributions from *N*-fertilized soil and fossil fuel combustion  $\text{NO}_x$  sources to Greenland ice core nitrate after 1970 was then calculated to be 3.2, 1.8, and 0.72 respective to different  $\delta^{15}\text{N}_{\text{NS}}$  values. In other words, *N*-fertilized soil must have produced  $\text{NO}_x$  equivalent to 72–320% of that produced by fossil fuel combustion after 1970 to explain the observed  $\sim 14.4\text{‰}$  decrease in  $\delta^{15}\text{N}(\text{NO}_3^-)$  from 1850 to 1970 C.E. This is 4–32 times higher than previous model estimates (1).

It has to be emphasized that all of the above calculations (with somewhat unrealistic results) assume that there is no nitrogen isotope fractionation from  $\text{NO}_x$  source to sink (nitrate in ice core), which is clearly not the case as demonstrated in this study.

In addition, the other assumption/adoption in Felix et al. (11) that the measured pre-1850 mean value of  $\delta^{15}\text{N}(\text{NO}_3^-)$  represents the  $\delta^{15}\text{N}$  value of  $\text{NO}_x$  from biomass burning and equals that from fossil fuel combustion is problematic due to at least in part to the enrichment of  $\delta^{15}\text{N}$  of snow nitrate from postdepositional loss.

**1.3. Calculating Annual  $[\text{H}^+]$  and  $[\text{HNO}_3]$ .** From the profiles of the chemical impurities obtained from Core 1, we calculated the annual concentration of  $\text{H}^+$  in precipitation from 1772 to 2006 through ion balance:

$$[\text{H}^+] = [\text{Cl}^-] + [\text{NO}_3^-] + [\text{SO}_4^{2-}] - [\text{Na}^+] - [\text{NH}_4^+] - [\text{K}^+] - [\text{Mg}^{2+}] - [\text{Ca}^{2+}]. \quad [\text{S3}]$$

All concentrations are in microequivalents per liter. This method was demonstrated to yield  $[\text{H}^+]$  record in good agreement with actual measurement of ice core  $[\text{H}^+]$  by a continued flow system attached with a glass pH electrode (13). Organic acids are also present in ice cores, but ignoring their contributions only induces negative  $\text{H}^+$  values in years with large biomass burning impacts and will not affect the overall trends of  $\text{H}^+$  (13, 14).

In addition, we calculated the concentration of acid form nitrate ( $\text{HNO}_3$ ) in the ice core from 1772 to 2006 by mass balance:

$$[\text{HNO}_3] = [\text{H}^+] - (\text{nss}[\text{SO}_4^{2-}] - [\text{NH}_4^+]), \quad [\text{S4}]$$

where  $\text{nss}[\text{SO}_4^{2-}]$  is the difference between total sulfate concentration and sea salt sulfate that is  $0.25 \times [\text{Na}^+]$  (15). We first calculated  $\text{nss}[\text{SO}_4^{2-}]$  in nanograms per liter using the  $\text{SO}_4^{2-}/\text{Na}^+$  weight ratio of 0.25, and then converted that to microequivalents per liter. This calculation assumes ice core acidity is dominated by sulfuric acid and nitric acid. The calculated concentration of  $\text{HNO}_3$  represents the contribution of gas-phase nitrate to total ice core nitrate concentrations.

**1.4. Fractionation in Partitioning of  $\text{HNO}_{3(\text{g})}$  and  $p\text{-NO}_3^-$ .** In the atmosphere, nitrate partitions between the gas and aerosol phases (in aerosols, nitrate exists mainly in the aqueous phase of the surface liquid layer of aerosols) and the partial vapor pressure of  $\text{HNO}_{3(\text{g})}$  are determined by the aerosol liquid water content and effective Henry's law constant (16).

$$[\text{Nitrate}]_{\text{T}} = \frac{P_{\text{HNO}_3}}{RT} + [\text{Nitrate}]_{\text{aq}} \times W_L, \quad [\text{S5}]$$

where  $[\text{Nitrate}]_{\text{T}}$  represents the total nitrate concentration in the atmosphere (moles per liter of air);  $P_{\text{HNO}_3}$  represents the partial pressure of  $\text{HNO}_{3(\text{g})}$ ;  $[\text{Nitrate}]_{\text{aq}}$  represents the concentration of nitrate in aqueous phase ( $p\text{-NO}_3^-$ , in moles per liter of water); and  $W_L$  is the liquid water content of aerosols (grams per liter of air). The relationship between  $[\text{Nitrate}]_{\text{aq}}$  and  $P_{\text{HNO}_3}$  follows Henry's law:

$$[\text{Nitrate}]_{\text{aq}} = H \times \left(1 + \frac{K_{\text{nl}}}{[\text{H}^+]}\right) \times P_{\text{HNO}_3} \approx \frac{3.2 \times 10^6}{[\text{H}^+]} \times P_{\text{HNO}_3}. \quad [\text{S6}]$$

$H$  is the Henry's law constant for nitric acid ( $2.1 \times 10^5 \text{ M atm}^{-1}$  at 298 K);  $K_{\text{nl}}$  is the dissociation constant for nitric acid (15.4 M at 298 K). For simplicity, ideal conditions were assumed so that Henry's law can be applied without involving activity coefficients. The implications of this assumption for our results are explored below.

As precipitation dilutes  $[\text{H}^+]$  compared with aerosols, we scaled the calculated  $\text{H}^+$  concentration to aerosol acidity according

to an approximate median aerosol pH of 4 [aerosol pH varies from 3 to 5 for aerosol diameters ( $D_p$ ) larger than  $2 \mu\text{m}$ , and  $\text{pH} = 2\text{--}5$  with  $D_p < 2 \mu\text{m}$  (17)]. Typical liquid water content ( $W_L$ ) of aerosol was estimated to be in the order of  $10^{-6} \text{ g m}^{-3}$  of air (17, 18). Combining Eqs. S5 and S6, we calculated  $f$  (Eq. 4) in each year from 1772 to 2006. To avoid the impacts of extremely elevated  $\text{H}^+$  concentrations caused by volcanic eruptions and negative  $\text{H}^+$  concentrations caused by ignoring organic acid from large biomass burning events on the calculations of  $f$ , we smoothed out such events by replacing their  $\text{H}^+$  values with the average of  $\text{H}^+$  concentrations in years before and after each individual event. Then we apply  $f$  to the fractionation model equations, to calculate  $\delta^{15}\text{N}(\text{HNO}_{3(\text{g})})$  and  $\delta^{15}\text{N}(p\text{-NO}_3^-)$  in each year.

The value of the equilibrium fractionation constant between atmospheric  $\text{HNO}_{3(\text{g})}$  to  $p\text{-NO}_3^-$  is unknown. A field study in Antarctica, where  $\text{HNO}_{3(\text{g})}$  evaporates from snow grain surfaces, calculated an  $\varepsilon$  value of  $-8.5 \text{ ‰}$  at  $-10 \text{ }^\circ\text{C}$  (19). A laboratory study on the partitioning of nitrate between  $\text{HNO}_{3(\text{g})}$  and  $\text{NH}_4\text{NO}_3$  particles calculated an  $\varepsilon$  value of  $-21 \text{ ‰}$  at  $25 \text{ }^\circ\text{C}$  (20). We applied the  $\varepsilon$  values from these two analog cases to our model for best estimates. In the purpose of simplification, we fixed the model temperature at 298 K. The calculated fractionation result, denoted as  $\delta^{15}\text{N}(\text{NO}_3^-)_{\text{m}}$ , is represented by the difference between  $\delta^{15}\text{N}(\text{HNO}_{3(\text{g})})$  and  $\delta^{15}\text{N}(p\text{-NO}_3^-)$ . The modeled  $\delta^{15}\text{N}(\text{NO}_3^-)$  plotted in Fig. 2D was adjusted by adding the observed pre-1850 mean of  $\delta^{15}\text{N}(\text{NO}_3^-)$  to the calculated  $\delta^{15}\text{N}(\text{NO}_3^-)_{\text{m}}$  anomaly from 1772 to 2006, where the anomaly is relative to the pre-1850 mean of  $\delta^{15}\text{N}(\text{NO}_3^-)_{\text{m}}$ . The  $\varepsilon$  value of  $-21 \text{ ‰}$  with a fixed model temperature at 298 K gave the best result compared with the observations as shown in Fig. 2D. Using  $\varepsilon = -8.5 \text{ ‰}$  underestimates the magnitude of the  $\delta^{15}\text{N}(\text{NO}_3^-)$  decrease by  $5.9 \text{ ‰}$ , which is probably because the snow surface is more like a disorganized layer instead of a liquid layer as on the surface of aerosols and thus the fractionation process occurring at the snow surface may be quite different from that in the aerosol surface.

To test the sensitivity of the modeled  $\delta^{15}\text{N}(\text{NO}_3^-)$  to temperature, we performed preliminary sensitivity studies by varying our model temperature with  $\varepsilon = -21 \text{ ‰}$ . We found that at lower temperatures ( $< 298 \text{ K}$ ), the magnitude of the decrease of modeled  $\delta^{15}\text{N}(\text{NO}_3^-)$  from 1850 to 1970 is reduced due to the temperature dependence of the Henry's law coefficient and the dissociation constant of nitric acid. However, when varying the model temperature, two other model parameters must be also varied: aerosol liquid water content ( $W_L$ ) (18) and the equilibrium isotope fractionation constant. Unfortunately, quantitative information regarding the temperature dependence of aerosol water liquid content and the equilibrium fractionation factor between atmospheric  $\text{HNO}_{3(\text{g})}$  to  $p\text{-NO}_3^-$  are unknown.

In addition, when calculating  $f$  using Eqs. S5 and S6, we assumed ideal conditions so that Henry's law can be applied. In reality, activity coefficients of ions in aerosol must be considered because atmospheric aerosols are usually concentrated solutions that deviate from ideality. To examine the implications of this assumption on our conclusions, we used an aerosol thermodynamic equilibrium model, ISORRPIA II (21), to calculate  $f$  in the preindustrial period and in the 1970s, and then applied the calculated  $f$  to the Rayleigh fractionation model to calculate the decrease in  $\delta^{15}\text{N}(\text{NO}_3^-)$  from the preindustrial period to the 1970s. Assuming that the partitioning of  $\text{HNO}_{3(\text{g})}$  and  $p\text{-NO}_3^-$  and the fractionation between them mainly occur in their source regions, we used the average concentrations of  $\text{Cl}^-$ ,  $\text{NO}_3^-$ ,  $\text{SO}_4^{2-}$ ,  $\text{Na}^+$ ,  $\text{K}^+$ ,  $\text{Mg}^{2+}$ , and  $\text{Ca}^{2+}$  from the model's default input data for continental urban and rural scenarios to represent present-day values, and scaled them down to estimate their values in the 1970s and in the preindustrial period based on their concentration changes documented by the ice core record shown here. Due to the very low abundance of  $\text{NH}_4^+$  in Greenland ice cores

and the fact that the ice core record does not capture the increasing trend in  $\text{NH}_4^+$  expected from anthropogenic emission changes (22), we adjusted the concentration of  $\text{NH}_4^+$  in different periods based on the  $\text{NH}_3$  emission inventory data in the United States (23). At 298 K, and with 90% relative humidity, the decrease in  $\delta^{15}\text{N}(\text{NO}_3^-)$  was calculated to be 36.2‰ with  $\varepsilon = -21$ ‰ and 14.2‰ with  $\varepsilon = -8.5$ ‰. The magnitude of the calculated decrease in  $\delta^{15}\text{N}(\text{NO}_3^-)$  increases with decreasing temperature and/or relative humidity. The decrease in  $\delta^{15}\text{N}(\text{NO}_3^-)$  calculated by applying the ISORROPIA II model is much larger than that (15.6‰ with  $\varepsilon = -21$ ‰ and 8.9‰ with  $\varepsilon = -8.5$ ‰) calculated by applying Eqs. S5 and S6, suggesting that our assumption (ideal conditions) may lead to an underestimate of the decrease originating from the acidity change. We note that our model does not consider the effect of increases in fossil fuel  $\text{NO}_x$ , which is expected to increase  $\delta^{15}\text{N}(\text{NO}_3^-)$ .

**1.5. Fractionation in  $\text{NO}_x$  Cycling.** Atmospheric NO and  $\text{NO}_2$  cycle rapidly in the presence of  $\text{O}_3$  ( $\text{HO}_2/\text{RO}_2$ ) and sunlight:

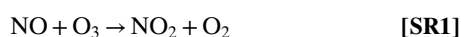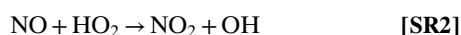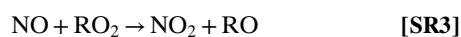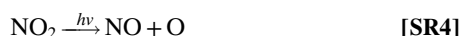

$\text{NO}_2$  is removed from this cycle by being converted to  $\text{HNO}_3$ . The conversion of  $\text{NO}_2$  to  $\text{HNO}_3$  is considered to have little or no nitrogen isotope fractionation (24, 25); thus  $\delta^{15}\text{N}$  of total nitrate should reflect that of  $\text{NO}_2$ . Based on a box model (24), the abundance of  $^{15}\text{N}$  in  $\text{NO}_2$  can be expressed as the following equation:

$$[^{15}\text{NO}_2] = [^{15}\text{NO}_x] - \frac{[^{15}\text{NO}_x]}{1 + \alpha \cdot \frac{[\text{NO}_2]}{[\text{NO}]}} \quad \text{[S7]}$$

where  $\alpha$  is the equilibrium fractionation factor between NO and  $\text{NO}_2$ . Assuming steady state between  $\text{NO}_2$  and NO in  $\text{NO}_x$  cycling, the ratio of  $\text{NO}_2$  to NO can be calculated as:

$$\frac{[\text{NO}_2]}{[\text{NO}]} = \frac{k_1 \times [\text{O}_3]}{k_2} \quad \text{[S8]}$$

where  $k_1$  and  $k_2$  represent the rate constants of Reactions SR1 and SR4, respectively. To simplify the calculation, we ignored the conversion of NO to  $\text{NO}_2$  through Reactions SR2 and SR3 as Reaction SR1 dominates the conversion (80–90%) throughout most of the troposphere (26).

Using model calculated  $\text{O}_3$  concentrations for the present day (42 ppbv) and the preindustrial period (24 ppbv) in northern midlatitudes (30°N–60°N) (27), and  $\alpha = 1.018$  (25), we calculated a decrease in  $\delta^{15}\text{N}(\text{NO}_2)$  of 2.2‰ from preindustrial period to the present day owing to this  $\text{O}_3$  concentration increase. Including the concentration change of  $\text{NO}_x$  from preindustrial period to the present day based on GEOS-Chem model input data (27) did not change this result. The increase in tropospheric  $\text{O}_3$  abundance explains up to ~15% of the observed decrease in  $\delta^{15}\text{N}(\text{NO}_3^-)$  from 1850 to 1970 C.E.

**1.6. Impacts of Postdepositional Processing.** Ice core  $\delta^{15}\text{N}(\text{NO}_3^-)$  is known to be affected by postdepositional processing. Postdepositional processing of snow nitrate is thought to be dominated by the photolysis of snow nitrate to  $\text{NO}_x$  (28), but is also influenced

by evaporation of  $\text{HNO}_3$  from the disorganized layer of snow grain surfaces (28, 29). In either case, nitrate remaining in snow is enriched in  $^{15}\text{N}$  relative to the molecules [ $\text{NO}_x$  or  $\text{HNO}_3(\text{g})$ ] leaving snow. Therefore, changes in the degree of postdepositional processing will cause variations in ice core  $\delta^{15}\text{N}(\text{NO}_3^-)$ . The degree of postdepositional processing is influenced by snow accumulation rate which determines the residence time of nitrate in the photolytic zone (19), the abundance of light-absorbing impurities [i.e., black carbon (BC)] in snow which determines the penetration depth of UV actinic flux (30), and also snow acidity that promotes snow nitrate evaporation (28) and photolysis (31). Thus, either a snow accumulation rate increase, black carbon concentration increase, or snow acidity decrease from 1850 to 1970 could cause decrease in  $\delta^{15}\text{N}(\text{NO}_3^-)$  during the same time period by limiting postdepositional loss. The snow accumulation rate at Summit stays relatively constant in the last ~200 y (Fig. S24), ice core BC concentrations increased from ~1850 to 1920 and decreased afterward (14), and snow acidity increased from 1850 to 1970 (Fig. 24). Although the large  $\delta^{15}\text{N}(\text{NO}_3^-)$  values observed in Greenland snow deposited before 1850 relative to natural  $\text{NO}_x$  sources (Table S1) suggest that postdepositional processing is influencing the Greenland ice core nitrate record, variations in postdepositional processing due to changes in snow accumulation, UV absorbing impurities in the snow, or snow acidity cannot explain the observed long-term decrease in  $\delta^{15}\text{N}(\text{NO}_3^-)$  from 1850 to 1970. The increase in BC concentrations from 1850 to ~1920 may contribute to the decrease in  $\delta^{15}\text{N}(\text{NO}_3^-)$  during this period. However, the effect of BC on the degree of postdepositional processing of snow nitrate is small. Snow impurities, including BC, influence the postdepositional processing of snow nitrate through absorbing UV radiation, reducing the radiation in the snow for the photolysis of snow nitrate that occurs between wavelengths of 300 and 320 nm (32). However, the absorption of UV radiation in snow is dominated (>85%) by non-BC material such as HULIS and dust (30, 33), with BC accounting for the rest of the absorption of UV radiation (<15%). Although BC concentration increased from ~1850 to ~1920 due to industrial activities (coal combustion) (14), the increase in HULIS [represented by vanillic acid concentration, because vanillic acid and HULIS both originate mainly from biomass burning (34)] was not apparent (14). In addition, the concentration of dust [represented by  $\text{Ca}^{2+}$  concentration (Fig. S2B)] decreased from ~1850–1920. Therefore, it is unlikely that changes in postdepositional processing can account for the observed decrease in  $\delta^{15}\text{N}$  from ~1850–1920.

**1.7. Acidity Effect of Volcanic Eruptions.** In case of atmospheric acidity arising from volcanic eruptions, one may expect similar decreases in  $\delta^{15}\text{N}$  of ice core nitrate. We argue that the response of  $\delta^{15}\text{N}$  of ice core nitrate depends primarily on the atmospheric acidity in the  $\text{NO}_x$  source regions. Unlike anthropogenic  $\text{SO}_2$  sources, a volcanic eruption provides a single point source of  $\text{SO}_2$  that is unlikely able to perturb the atmospheric acidity over the vast areas of  $\text{NO}_x$  sources (e.g., the North American continent). The reason that these eruptions have left apparent signals in the Greenland ice sheet (Fig. 2B) is because they are either local, tropospheric eruptions occurring in Arctic (i.e., 1912 Katmai, Alaska; 1946 Hekla, Iceland; 1783 Laki, Iceland) or explosive eruptions occurring in the tropics with a large effect on the stratosphere (i.e., 1991 Pinatubo, Indonesia; 1883 Krakatoa, Indonesia; 1835 Cosiguina, Nicaragua; 1831 Babuyan, Philippines; 1815 Tambora, Indonesia). Stratospheric-scale volcanic eruptions raise polar atmospheric acidity (as observed in this ice core) through stratospheric transport (i.e., Brewer–Dobson circulation) and the downwelling of air in the polar vortex (35), but they are unlikely to perturb the atmospheric acidity in midlatitudes, as evident by northern midlatitude ice core records that display no signal for neither the 1815 Tambora eruption nor the 1991 Pinatubo eruption

(36). Therefore, decreases in  $\delta^{15}\text{N}$  of Greenland ice core nitrate are not expected in response to these eruptions via the mechanism proposed in this study. Indeed, for the periods corresponding to all of the major volcanic eruptions recorded in this ice core (Fig. 2B), including local, tropospheric eruptions and stratospheric-scale eruptions mentioned above except the 1815 Tambora and 1783 Laki eruptions, no decreases in  $\delta^{15}\text{N}$  are seen (the ice covering the 1815 Tambora and 1783 Laki eruptions was used up before this study; thus we don't have  $\delta^{15}\text{N}$  data for the period of these two events).

In sum, the relevant volcanic eruptions mentioned above raise Arctic atmospheric acidity, and thus Arctic snow acidity. Con-

sequently, snow-sourced  $\text{NO}_x$  with low  $\delta^{15}\text{N}$  in the Arctic should be enhanced during these episodic periods if acidity does indeed provide a significant control on the degree of snow nitrate photolysis. Meanwhile, the degree of postdepositional processing of snow nitrate at Summit is also enhanced due to snow acidity increase. The net isotopic effect of this process on ice core  $\delta^{15}\text{N}$ , as discussed earlier, depends on the net loss or gain of snow nitrate resulting in enrichment and depletion in  $\delta^{15}\text{N}$ , respectively. The fact that  $\delta^{15}\text{N}$  of ice core nitrate shows no change in response to the above mentioned volcanic eruptions suggests that the effect of snow acidity changes on  $\delta^{15}\text{N}$  due to possible enhancements of postdepositional processing of snow nitrate is negligible.

- Jaegle L, Steinberger L, Martin RV, Chance K (2005) Global partitioning of  $\text{NO}_x$  sources using satellite observations: Relative roles of fossil fuel combustion, biomass burning and soil emissions. *Faraday Discuss* 130:407–423.
- Rafter PA, Sigman DM, Charles CD, Kaiser J, Haug GH (2012) Subsurface tropical Pacific nitrogen isotopic composition of nitrate: Biogeochemical signals and their transport. *Global Biogeochem Cycles* 26:G61003.
- Salzmann R, Nussbaumer T (2001) Fuel staging for  $\text{NO}_x$  reduction in biomass combustion: Experiments and modeling. *Energy Fuels* 15(3):575–582.
- Kendall C, Elliott EM, Wankel SD (2007) Tracing anthropogenic inputs of nitrogen to ecosystems. *Stable Isotopes in Ecology and Environmental Science*, eds Lajtha K, Michener RH (Blackwell Scientific Publications, Oxford), pp 375–449.
- Spaelstra J, Schiff SL, Hazlett PW, Jeffries DS, Semkin RG (2007) The isotopic composition of nitrate produced from nitrification in a hardwood forest floor. *Geochim Cosmochim Acta* 71(15):3757–3771.
- Morin S, et al. (2009) Comprehensive isotopic composition of atmospheric nitrate in the Atlantic Ocean boundary layer from 65°S to 79°N. *J Geophys Res* 114: D05303.
- Elliott EM, et al. (2007) Nitrogen isotopes as indicators of  $\text{NO}_x$  source contributions to atmospheric nitrate deposition across the Midwestern and northeastern United States. *Environ Sci Technol* 41(22):7661–7667.
- Ammann M, et al. (1999) Estimating the uptake of traffic-derived  $\text{NO}_2$  from  $^{15}\text{N}$  abundance in Norway spruce needles. *Oecologia* 118(2):124–131.
- Moore H (1977) The isotopic composition of ammonia, nitrogen dioxide, and nitrate in the atmosphere. *Atmos Environ* 11(12):1239–1243.
- Hastings MG, Jarvis JC, Steig EJ (2009) Anthropogenic impacts on nitrogen isotopes of ice-core nitrate. *Science* 324(5932):1288.
- Felix JD, Elliott EM (2013) The agricultural history of human-nitrogen interactions as recorded in ice core  $\delta^{15}\text{N}\text{-NO}_3^-$ . *Geophys Res Lett* 40(8):1642–1646.
- Holtgrieve GW, et al. (2011) A coherent signature of anthropogenic nitrogen deposition to remote watersheds of the Northern Hemisphere. *Science* 334(6062): 1545–1548.
- Pasteris DR, McConnell JR, Edwards R (2012) High-resolution, continuous method for measurement of acidity in ice cores. *Environ Sci Technol* 46(3):1659–1666.
- McConnell JR, et al. (2007) 20th-century industrial black carbon emissions altered Arctic climate forcing. *Science* 317(5843):1381–1384.
- Legrand M, Mayewski P (1997) Glaciochemistry of polar ice cores: A review. *Rev Geophys* 35(3):219–243.
- Seinfeld JH, Pandis SN (2006) *Atmospheric Chemistry and Physics: From Air Pollution to Climate Change* (Wiley, New York), 2nd Ed.
- Keene WC, Pszenny AAP, Maben JR, Stevenson E, Wall A (2004) Closure evaluation of size-resolved aerosol pH in the New England coastal atmosphere during summer. *J Geophys Res* 109:D23307.
- Kajino M (2003) *Modelling Liquid Water Content of Atmospheric Aerosols* (International Institute for Applied Systems Analysis, Laxenburg, Austria).
- Erland J, et al. (2013) Air–snow transfer of nitrate on the East Antarctic Plateau - Part 1: Isotopic evidence for a photolytically driven dynamic equilibrium. *Atmos Chem Phys* 13:6403–6419.
- Heaton THE, Spiro B, Madeline S, Robertson C (1997) Potential canopy influences on the isotopic composition of nitrogen and sulphur in atmospheric deposition. *Oecologia* 109(4):600–607.
- Fountoukis C, Nenes A (2007) ISORROPIA II: A computationally efficient thermodynamic equilibrium model for  $\text{K}^+$ - $\text{Ca}^{2+}$ - $\text{Mg}^{2+}$ - $\text{NH}_4^+$ - $\text{Na}^+$ - $\text{SO}_4^{2-}$ - $\text{NO}_3^-$ - $\text{Cl}^-$ - $\text{H}_2\text{O}$  aerosols. *Atmos Chem Phys* 7(17):4639–4659.
- Wolff EW (2013) Ice sheets and nitrogen. *Philos Trans R Soc B* 368(1621):20130127.
- Lamarque JF, et al. (2010) Historical (1850–2000) gridded anthropogenic and biomass burning emissions of reactive gases and aerosols: Methodology and application. *Atmos Chem Phys* 10(15):7017–7039.
- Jarvis JC, Steig EJ, Hastings MG, Kunasek SA (2008) Influence of local photochemistry on isotopes of nitrate in Greenland snow. *Geophys Res Lett* 35(21):L21804.
- Freyer HD, Kley D, Volzthomas A, Kobel K (1993) On the interaction of isotopic exchange processes with photochemical reactions in atmospheric oxides of nitrogen. *J Geophys Res* 98(D8):14791–14796.
- Alexander B, et al. (2009) Quantifying atmospheric nitrate formation pathways based on a global model of the oxygen isotopic composition ( $\Delta^{17}\text{O}$ ) of atmospheric nitrate. *Atmos Chem Phys* 9(14):5043–5056.
- Sofen ED, Alexander B, Kunasek SA (2011) The impact of anthropogenic emissions on atmospheric sulfate production pathways, oxidants, and ice core  $\Delta^{17}\text{O}$   $\text{SO}_4^{2-}$ . *Atmos Chem Phys* 11(7):3565–3578.
- Frey MM, Savarin J, Morin S, Erland J, Martins JMF (2009) Photolysis imprint in the nitrate stable isotope signal in snow and atmosphere of East Antarctica and implications for reactive nitrogen cycling. *Atmos Chem Phys* 9(22):8681–8696.
- Blunier T, Floch GL, Jacobi HW, Quansah E (2005) Isotopic view on nitrate loss in Antarctic surface snow. *Geophys Res Lett* 32(13):L13501.
- Zatko MC, et al. (2013) The influence of snow grain size and impurities on the vertical profiles of actinic flux and associated  $\text{NO}_x$  emissions on the Antarctic and Greenland ice sheets. *Atmos Chem Phys* 13(7):3547–3567.
- Abida O, Osthoff HD (2011) On the pH dependence of photo-induced volatilization of nitrogen oxides from frozen solutions containing nitrate. *Geophys Res Lett* 38:L16808.
- Chu L, Anastasio C (2003) Quantum yields of hydroxyl radical and nitrogen dioxide from the photolysis of nitrate on ice. *J Phys Chem A* 107(45):9594–9602.
- Beine H, et al. (2011) Soluble, light-absorbing species in snow at Barrow, Alaska. *J Geophys Res* 116:D00R05.
- Lin P, Engling G, Yu JZ (2010) Humic-like substances in fresh emissions of rice straw burning and in ambient aerosols in the Pearl River Delta Region, China. *Atmos Chem Phys* 10(14):6487–6500.
- Holton JR, et al. (1995) Stratosphere-troposphere exchange. *Rev Geophys* 33(4):403–439.
- Kaspari S, et al. (2009) Recent increases in atmospheric concentrations of Bi, U, Cs, S and Ca from a 350-year Mount Everest ice core record. *J Geophys Res* 114:D04302.

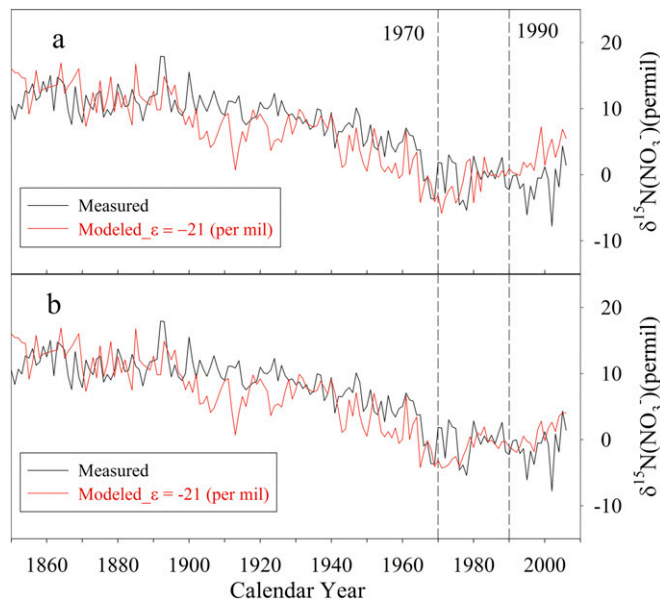

**Fig. S1.** Effect of the potential difference in the trends in  $\text{SO}_2$  emissions and ice core sulfate concentrations after  $\sim 1990$  on the model result. (A) The acidity used in the model is calculated from measured ice core ion concentrations throughout the record (B) When calculating the acidity, sulfate concentrations after 1970 are scaled according to  $\text{SO}_2$  emission data (see main text for more details).

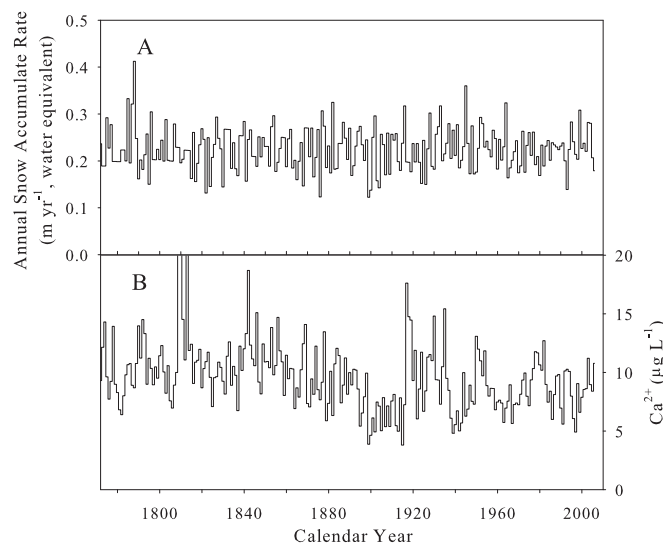

**Fig. S2.** (A) Annual snow accumulation rate (in water equivalent size) and (B) snow calcium concentration from 1772 to 2006 at Summit, Greenland.

**Table S1. Values of  $\delta^{15}\text{N}$  of  $\text{NO}_x$  from various sources**

| Sources                 |                   | $\delta^{15}\text{N}$ , ‰, vs. $\text{N}_2$ | References |
|-------------------------|-------------------|---------------------------------------------|------------|
| Coal combustion         | Coal power plant  | 6–13                                        | (1)        |
|                         |                   | 9.2–25.6                                    | (2)        |
| Petroleum combustion    | Heating source    | –5.3                                        | (3)        |
|                         | Vehicle emission  | –13 to –2                                   | (1)        |
|                         |                   | $5.7 \pm 2.8$                               | (4)        |
|                         |                   | 3.9–5.4                                     | (3)        |
|                         |                   | 3.4–3.9                                     | (5)        |
| Natural gas combustion  | Heating source    | –19.4 to 2.9                                | (3)        |
|                         | Heating source    | 3.0–15.4                                    | (3)        |
| Waste incinerators      |                   | 5.5–8.0                                     | (3)        |
| Soil emissions          | N-fertilized soil | –48.9 to –19.9                              | (6)        |
|                         | Unfertilized soil | $-9.3 \pm 3.5$                              | (5)        |
| Lightning               |                   | –0.5–1.4                                    | (7)        |
| Biomass burning         |                   | <0*                                         |            |
| Snow nitrate photolysis |                   | –50 to –20 <sup>†</sup>                     |            |

Darker shading represents anthropogenic sources, while lighter shading distinguishes the biogenic process affected by synthesized N-fertilizer.

\*Predicted to be negative, see *SI Text*.

<sup>†</sup>Predicted from  $\delta^{15}\text{N}$  measurement of atmospheric boundary layer nitrate in snow-covered areas (28).

1. Heaton THE (1990)  $^{15}\text{N}/^{14}\text{N}$  ratios of  $\text{NO}_x$  from vehicle engines and coal-fired power stations. *Tellus B* 42(3):304–307.
2. Felix JD, Elliott EM, Shaw SL (2012) Nitrogen Isotopic Composition of Coal-Fired Power Plant  $\text{NO}_x$ : Influence of Emission Controls and Implications for Global Emission Inventories. *Environ Sci Technol* 46(6):3528–3535.
3. Widory D (2007) Nitrogen isotopes: Tracers of origin and processes affecting  $\text{PM}_{10}$  in the atmosphere of Paris. *Atmos Environ* 41(11):2382–2390.
4. Ammann M, et al. (1999) Estimating the uptake of traffic-derived  $\text{NO}_2$  from  $^{15}\text{N}$  abundance in Norway spruce needles. *Oecologia* 118(2):124–131.
5. Moore H (1977) The isotopic composition of ammonia, nitrogen dioxide, and nitrate in the atmosphere. *Atmos Environ* 11(12):1239–1243.
6. Li DJ, Wang XM (2008) Nitrogen isotopic signature of soil-released nitric oxide (NO) after fertilizer application. *Atmos Environ* 42(19):4747–4754.
7. Hoering T (1957) The isotopic composition of the ammonia and the nitrate ion in rain. *Geochim Cosmochim Acta* 12:97–102.

## Other Supporting Information Files

[Dataset S1 \(PDF\)](#)
