# Supplementary material
Source: PubMed Central journal article supplement (PMC4000786)
Supplement: 1319441111_sd01.pdf [file 1319441111_sd01.pdf]

## The Rayleigh model used in SI Section 1.4 (fractionation in gas/particle partitioning of nitrate):

```
clear all
%using the ice-core measured H+ concentrations, scaled to
%aerosol acidity
%not consider T change from the entire record, model the
%trend of d15N from 1772 to 2006

%data in
age=xlsread('acidity_T.xlsx', 'H1:H236'); %time period of the record
Hi=xlsread('acidity_T.xlsx', 'I1:I236'); %ice core H+ concentrations
%volcanic peaks/biomass burning valleys were replaced
%with average of before/after points;
Rd15N=xlsread('acidity_T.xlsx', 'K1:K236'); %Measured d15N, gaps were
%filled with averages of before/after
%Ta=xlsread('acidity_T.xlsx', 'M1:M236'); %Temperature anomaly in
%Northern Hemisphere, turn on when testing the sensitive to T change;
H=10^(-4).*Hi; %scaling to aerosol acidity, according to an aerosol pH
%of 4
T=298.15;%assuming standard temperature
%T=287.15+Ta;%varying temperature according to Northern hemisphere
%temperature anomaly, turn on when necessary;
Wl=10^(-12); %liquid water content of aerosols, 10^-6 g m-3
%(10^-12 L/L air)

%Calculated the fraction of p-NO3- in total nitrate

Y=15.4*2.1*10^5.*exp(-8700*(1/298.15-1./T)).*exp(8700*(1./T-
1/298.15)); %Henry's law constant and HNO3 dissociation constant vary
%with T, here consider T constant
%[HNO3]=PHNO3/(R*T)+[NO3-]*Wl, total atmospheric nitrate concentration
%(mol/L air) equals to concentration in gas form (mol/L air) plus
%nitrate in
%particle form (mol/L water)
%f=Wl/(H/R*T*Y+Wl), fraction of particle nitrate in total nitrate
x=0.08206.*T;
X=x.*Y;
B=Wl+H./X;
f=Wl./B;%fraction of P-no3in total nitrate

e=-0.021;% fractionation constant
d15N1=(1+0).*f.^e-1; % particle phase N15, starting material with
d15N=13.4 per mil, using the average of d15N before 1850
d15N2=(1+0).(1-f.^(e+1))./(1-f)-1; %gas phase N15, starting material
with d15N=13.4 per mil, using the average of d15N before 1850
D_d15N=1000.*d15N2-1000.*d15N1; %difference between gas and particle
%phase
dif=D_d15N(1:end)-mean(D_d15N(1:80));%this gives the changes in d15N
%relative to pre-1850 values
C_d15N=dif+13.4;%13.4 is the measured average d15N before 1850; this
%forces the modeled result agree with the measured d15N before 1850;

%when e=-0.0085
```

```

e=-0.0085;% fractionation constant
d15N11=(1+0).*f.^e-1; % particle phase N15
d15N21=(1+0).* (1-f.^(e+1))./(1-f)-1; %gas phase N15
D_d15N1=1000.*d15N21-1000.*d15N11; %difference between gas and particle
%phase
dif1=D_d15N1(1:end)-mean(D_d15N1(1:80));% this gives the changes in
%d15N relative to pre-1850 values
C_d15N1=dif1+13.4; %this forces the modeled result agree with the
%measured d15N before 1850;

```

```

fig('units','inches','width',7,'height',5,'font','Helvetica','fontsize'
,16,'border','on');

```

```

title('Summit N15 trend')
xlabel('Age(calendar year)')
ylabel('\delta^{15}N(per mil)');
hold on;
plot(age,Rd15N,'r');
hold on
plot(age,C_d15N,'b');
hold on
plot(age,C_d15N1,'g');
hold on

```

```

hleg1=legend('measured','modeled e=-0.021','modeled e=-0.0085');
axis([1770 2010 -20 40]) ;
set(gca,'XTick',[1770:40:2010]);

```

```

% end;

```

### **The model used in S1.5 (fractionation in NO<sub>x</sub> cycle):**

```

% model is modified from the original box model developed by J. Jarvis
and E.
% Steig
% NOx concentration change from preindustrial period to the present day
% doesn't affect the final results, so NOx can be turned on or off;
% this model also calculate the d15N of Nitrate assuming no additional
% fractionation occurs from the conversion of NO2 to HNO3

```

```

clear all
% using GEOS-chem input concentrations for PI and PD, unit:
molecules/cc
O3 = [5.99079E+11 1.04574E+12];
NOx = [1163844358 8212086750];
% NOx = [1163844358 1163844358];
OH = [1054885.3 1328296.9];
T = [298 298]; %assuming no temperature change between PI and PD
% Reactions involved

```

```

% R1 NO + O3 --> O2 + NO2, this direction is dominated by O3 oxidation,
for
% simplification, ignor HO2/RO2
% R2 NO2 + hv --> O + NO
% R3 NO2 + OH --> HNO3      where rate = k3*NO2*OH
% R4 NO2 + O3 --> NO3 + O2 where rate = k4*NO2*O3
% R5 NO3 + NO2 --> N2O5     where rate = k5*NO3*NO2
% R6 N2O5 + H2O --> 2HNO3  where rate = k6*N2O5 (assume H2O is abundant
in
% troposphere)
k1 = 3.0E-12*exp(-1500./T);          %cm3/molecules/s; JPL 2003
k2 = 8e-3; %s-1 at surface (8E-3 in Seinfeld and Pandis, p.144)
k3 = (2.4E-30).*((T/300).^(-3.1));   %cm3/molecules/s; Joel T. value
from JPL 2000
k4 = 1.2E-13.*exp(2450./T);          %cm3/molecules/s; JPL 2003
k5 = (2.2E-30).*((T/300).^(-3.9));   %cm3/molecules/s; Joel T. value
from JPL 2000
k6 = 2.0E-21;                        %k6 at 298 is less than 2.0E-21;
cm3/molecules/s; JPL 2003

% Let Rstd reflect the natural abundance of 15N.
Rstd = 0.0036;
%Let M represent 15-N in general.
%Set d15N of bulk NOx to be 15 per mil lighter than the standard.
MOx = (Rstd-Rstd*15/1000).*NOx;
alpha1 = 1.018;
NO2 = NOx./(1+(k2./(k1.*O3))); % considering a steady state between NO
and NO2
NO = NOx - NO2;
MO = MOx./(1 + alpha1*NO2./NO);
MO2 = MOx - MO;

% Putting in delta notation gives us
d15NO = (MO./(NO-MO) - Rstd)/Rstd * 1000;
d15NO2 = (MO2./(NO2-MO2) - Rstd)/Rstd * 1000;

PI = d15NO2(1);
PD = d15NO2(2);
d15NO2_change = PD-PI;

% Figure Plot d15N of NO2 in PI and PD;
figure;
bar2(d15NO2); ylabel('\delta ^{15}N of NO2');
set(gca,'XTickLabel',{'PI';'PD'});

% calculating d15N in nitrate, assuming alpha = 1;

N2O5 = k4.*NO2.*O3./k6;
HNO3flux_fromN2O5path = k6.*N2O5;
HNO3flux_fromOHpath = k3.*NO2.*OH;
HNO3flux = HNO3flux_fromOHpath + HNO3flux_fromN2O5path;
alpha2 = 1;
HMO3flux = alpha2.*HNO3flux.*MO2./NO2;
d15HNO3 = (HMO3flux./HNO3flux - Rstd)/Rstd * 1000;

```

```

% Figure Plot d15N of NO2 in PI and PD;
figure;
bar2(d15HNO3); ylabel('\delta ^{15}N of HNO3');
set(gca, 'XTickLabel', {'PI'; 'PD'});

%end

```

**Database:** (concentrations are in  $\mu\text{eq L}^{-1}$ )

|         | $\delta^{15}\text{N}(\text{NO}_3^-)$ | $\text{NO}_3^-$ | $\text{SO}_4^{2-}$ | $\text{H}^+$ | $\text{HNO}_3$ |
|---------|--------------------------------------|-----------------|--------------------|--------------|----------------|
| 2006.00 | 1.44                                 | 1.95            | 0.91               | 1.99         | 1.49           |
| 2005.00 | 4.33                                 | 1.69            | 0.60               | 1.74         | 1.45           |
| 2004.00 | -1.86                                | 2.03            | 0.97               | 2.20         | 1.82           |
| 2003.00 | 0.86                                 | 2.52            | 0.86               | 2.55         | 2.16           |
| 2002.00 | -7.78                                | 1.96            | 0.60               | 2.01         | 1.71           |
| 2001.00 | -0.77                                | 1.98            | 0.80               | 2.30         | 1.74           |
| 2000.00 | 1.18                                 | 2.39            | 0.89               | 2.81         | 2.16           |
| 1999.00 | -0.54                                | 1.36            | 0.50               | 1.68         | 1.28           |
| 1998.00 | -0.50                                | 1.93            | 0.92               | 2.29         | 1.65           |
| 1997.00 | -3.75                                | 2.11            | 0.81               | 2.99         | 2.37           |
| 1996.00 | -1.72                                | 1.99            | 0.85               | 2.73         | 2.00           |
| 1995.00 | -6.08                                | 2.39            | 1.10               | 2.88         | 2.25           |
| 1994.00 | -1.36                                | 2.22            | 1.28               | 2.70         | 1.97           |
| 1993.00 | -2.09                                | 2.23            | 1.39               | 3.17         | 1.97           |
| 1992.00 | -0.04                                | 2.42            | 2.67               | 3.11         | 2.27           |
| 1991.00 | -0.19                                | 1.97            | 1.29               | 3.06         | 1.96           |
| 1990.00 | -2.26                                | 2.02            | 1.28               | 2.92         | 1.96           |
| 1989.00 | -1.84                                | 2.00            | 1.78               | 3.19         | 1.76           |
| 1988.00 | 2.62                                 | 1.96            | 1.59               | 2.99         | 1.74           |
| 1987.00 | 0.99                                 | 2.07            | 1.53               | 3.23         | 1.96           |
| 1986.00 | -0.63                                | 1.63            | 1.60               | 3.14         | 1.68           |
| 1985.00 | 0.68                                 | 1.69            | 1.86               | 3.18         | 1.53           |
| 1984.00 | -0.42                                | 1.64            | 1.70               | 3.06         | 1.51           |
| 1983.00 | 0.56                                 | 1.31            | 1.65               | 2.53         | 1.05           |
| 1982.00 | -0.72                                | 1.91            | 2.63               | 3.80         | 1.59           |
| 1981.00 | 0.76                                 | 1.85            | 2.08               | 3.02         | 1.58           |
| 1980.00 | 2.82                                 | 2.01            | 2.89               | 4.27         | 1.82           |
| 1979.00 | -1.49                                | 1.61            | 1.73               | 2.60         | 1.17           |
| 1978.00 | -5.39                                | 1.85            | 1.47               | 2.70         | 1.43           |
| 1977.00 | -3.84                                | 1.88            | 2.00               | 3.41         | 1.63           |
| 1976.00 | -4.59                                | 2.31            | 2.07               | 3.97         | 2.14           |

|         |       |      |      |      |      |
|---------|-------|------|------|------|------|
| 1975.00 | 1.71  | 1.79 | 2.82 | 4.29 | 1.73 |
| 1974.00 | 1.93  | 1.63 | 2.19 | 3.57 | 1.55 |
| 1973.00 | 3.02  | 1.92 | 2.27 | 3.74 | 1.70 |
| 1972.00 | -2.80 | 2.06 | 2.41 | 4.08 | 1.85 |
| 1971.00 | 1.77  | 2.09 | 2.94 | 4.77 | 2.03 |
| 1970.00 | 1.85  | 1.58 | 2.57 | 3.94 | 1.52 |
| 1969.00 | -3.71 | 1.89 | 2.51 | 4.22 | 1.84 |
| 1968.00 | -3.63 | 1.77 | 1.92 | 3.49 | 1.67 |
| 1967.00 | -0.42 | 1.44 | 1.88 | 3.17 | 1.41 |
| 1966.00 | -0.97 | 1.32 | 2.57 | 3.61 | 1.20 |
| 1965.00 | 3.76  | 1.82 | 2.67 | 4.26 | 1.75 |
| 1964.00 | 3.73  | 1.59 | 1.90 | 2.39 | 1.45 |
| 1963.00 | 5.84  | 1.23 | 1.50 | 2.59 | 1.15 |
| 1962.00 | 6.00  | 1.51 | 1.85 | 3.14 | 1.40 |
| 1961.00 | 7.07  | 1.33 | 1.68 | 1.78 | 1.14 |
| 1960.00 | 5.02  | 1.41 | 1.99 | 3.13 | 1.30 |
| 1959.00 | 4.71  | 1.49 | 2.13 | 3.27 | 1.36 |
| 1958.00 | 3.42  | 1.25 | 1.89 | 2.73 | 1.02 |
| 1957.00 | 4.29  | 1.67 | 1.75 | 3.08 | 1.50 |
| 1956.00 | 6.68  | 1.32 | 1.92 | 2.85 | 1.11 |
| 1955.00 | 2.71  | 1.35 | 2.15 | 3.04 | 1.07 |
| 1954.00 | 5.84  | 1.42 | 2.17 | 2.86 | 0.97 |
| 1953.00 | 3.77  | 1.19 | 1.51 | 2.15 | 0.87 |
| 1952.00 | 4.25  | 1.08 | 1.33 | 1.72 | 0.62 |
| 1951.00 | 7.56  | 1.19 | 1.92 | 2.36 | 0.71 |
| 1950.00 | 5.10  | 1.63 | 2.77 | 3.01 | 1.08 |
| 1949.00 | 4.27  | 1.31 | 1.64 | 2.75 | 1.17 |
| 1948.00 | 8.72  | 1.10 | 1.64 | 2.33 | 0.86 |
| 1947.00 | 10.10 | 1.01 | 1.40 | 1.71 | 0.50 |
| 1946.00 | 7.11  | 1.01 | 1.56 | 2.36 | 0.85 |
| 1945.00 | 7.89  | 0.99 | 1.16 | 1.89 | 0.81 |
| 1944.00 | 7.39  | 1.34 | 2.02 | 2.76 | 0.95 |
| 1943.00 | 6.46  | 0.98 | 2.24 | 2.88 | 0.87 |
| 1942.00 | 6.56  | 1.13 | 1.67 | 2.19 | 1.02 |
| 1941.00 | 4.01  | 0.95 | 1.09 | 1.70 | 0.73 |
| 1940.00 | 9.42  | 0.81 | 1.01 | 1.38 | 0.66 |
| 1939.00 | 6.94  | 0.77 | 1.27 | 1.74 | 0.66 |
| 1938.00 | 5.88  | 0.81 | 1.11 | 1.58 | 0.59 |
| 1937.00 | 9.77  | 0.78 | 1.12 | 1.42 | 0.47 |
| 1936.00 | 9.96  | 1.33 | 1.04 | 1.65 | 0.99 |
| 1935.00 | 7.32  | 1.05 | 1.51 | 1.69 | 0.37 |
| 1934.00 | 6.85  | 1.16 | 1.26 | 1.64 | 0.76 |
| 1933.00 | 8.34  | 0.90 | 1.14 | 1.59 | 0.66 |

|         |       |      |      |      |      |
|---------|-------|------|------|------|------|
| 1932.00 | 7.73  | 1.20 | 0.91 | 1.36 | 0.86 |
| 1931.00 | 8.74  | 0.89 | 1.01 | 1.27 | 0.52 |
| 1930.00 | 8.33  | 1.00 | 1.53 | 1.63 | 0.31 |
| 1929.00 | 9.20  | 1.36 | 1.67 | 1.87 | 1.10 |
| 1928.00 | 8.99  | 1.04 | 1.14 | 1.39 | 0.59 |
| 1927.00 | 9.69  | 1.34 | 1.21 | 1.68 | 0.84 |
| 1926.00 | 11.23 | 1.05 | 1.61 | 2.09 | 0.73 |
| 1925.00 | 8.89  | 1.02 | 1.52 | 2.00 | 0.86 |
| 1924.00 | 12.29 | 0.99 | 1.89 | 2.06 | 0.45 |
| 1923.00 | 10.55 | 1.50 | 1.60 | 2.34 | 1.21 |
| 1922.00 | 9.97  | 0.84 | 1.15 | 1.67 | 0.70 |
| 1921.00 | 10.10 | 1.11 | 1.24 | 1.52 | 0.55 |
| 1920.00 | 10.95 | 0.97 | 1.02 | 1.37 | 0.59 |
| 1919.00 | 8.80  | 1.39 | 1.69 | 1.50 | 0.72 |
| 1918.00 | 8.61  | 1.06 | 1.67 | 1.29 | 0.34 |
| 1917.00 | 8.10  | 1.03 | 1.64 | 1.61 | 0.15 |
| 1916.00 | 7.54  | 1.08 | 1.24 | 2.08 | 0.91 |
| 1915.00 | 8.28  | 0.96 | 1.00 | 1.80 | 0.98 |
| 1914.00 | 11.94 | 1.05 | 1.50 | 2.25 | 0.85 |
| 1913.00 | 10.85 | 1.20 | 1.90 | 2.97 | 1.18 |
| 1912.00 | 11.09 | 0.99 | 2.92 | 2.17 | 1.00 |
| 1911.00 | 11.10 | 0.90 | 1.00 | 1.36 | 0.61 |
| 1910.00 | 9.01  | 0.81 | 0.95 | 1.42 | 0.58 |
| 1909.00 | 9.42  | 1.07 | 0.88 | 1.60 | 0.98 |
| 1908.00 | 10.83 | 0.91 | 1.06 | 1.86 | 0.62 |
| 1907.00 | 12.70 | 0.88 | 1.41 | 2.12 | 0.77 |
| 1906.00 | 11.00 | 1.24 | 1.47 | 2.25 | 1.01 |
| 1905.00 | 9.58  | 1.05 | 0.91 | 1.79 | 1.00 |
| 1904.00 | 10.67 | 0.99 | 1.32 | 1.98 | 0.83 |
| 1903.00 | 12.04 | 0.95 | 1.47 | 2.01 | 0.78 |
| 1902.00 | 9.33  | 0.81 | 0.60 | 1.26 | 0.70 |
| 1901.00 | 11.77 | 1.02 | 0.87 | 1.70 | 0.97 |
| 1900.00 | 15.52 | 1.01 | 0.50 | 1.43 | 1.00 |
| 1899.00 | 10.05 | 1.10 | 0.80 | 1.63 | 1.06 |
| 1898.00 | 8.95  | 0.94 | 0.87 | 1.32 | 0.60 |
| 1897.00 | 9.50  | 1.02 | 0.71 | 1.23 | 0.77 |
| 1896.00 | 11.31 | 1.01 | 0.63 | 0.79 | 0.85 |
| 1895.00 | 9.49  | 0.81 | 0.56 | 0.97 | 0.69 |
| 1894.00 | 12.77 | 0.75 | 0.58 | 0.80 | 0.47 |
| 1893.00 | 17.87 | 1.16 | 0.87 | 0.64 | 0.80 |
| 1892.00 | 17.92 | 1.25 | 0.82 | 1.28 | 0.85 |
| 1891.00 | 12.18 | 0.91 | 0.82 | 1.28 | 0.65 |
| 1890.00 | 11.93 | 0.79 | 0.66 | 0.90 | 0.41 |

|         |       |      |      |      |       |
|---------|-------|------|------|------|-------|
| 1889.00 | 11.79 | 0.93 | 0.62 | 1.18 | 0.68  |
| 1888.00 | 10.41 | 1.01 | 0.59 | 1.12 | 0.47  |
| 1887.00 | 8.13  | 0.74 | 0.74 | 1.06 | 0.44  |
| 1886.00 | 10.60 | 0.77 | 0.56 | 0.98 | 0.56  |
| 1885.00 | 11.13 | 1.00 | 0.86 | 0.44 | 0.52  |
| 1884.00 | 12.92 | 1.20 | 1.28 | 1.64 | 0.67  |
| 1883.00 | 10.50 | 1.43 | 2.00 | 1.31 | 0.98  |
| 1882.00 | 10.29 | 0.76 | 0.65 | 0.97 | 0.56  |
| 1881.00 | 12.21 | 1.04 | 0.67 | 1.24 | 0.71  |
| 1880.00 | 13.75 | 0.86 | 0.51 | 0.91 | 0.65  |
| 1879.00 | 10.41 | 1.05 | 0.51 | 1.33 | 0.95  |
| 1878.00 | 9.04  | 0.79 | 0.64 | 0.64 | 0.22  |
| 1877.00 | 9.88  | 0.90 | 0.71 | 1.05 | 0.45  |
| 1876.00 | 8.70  | 1.11 | 0.55 | 1.32 | 0.82  |
| 1875.00 | 12.65 | 0.80 | 0.46 | 0.71 | 0.32  |
| 1874.00 | 12.20 | 0.99 | 1.10 | 1.35 | 0.32  |
| 1873.00 | 9.83  | 0.78 | 0.73 | 0.93 | 0.36  |
| 1872.00 | 10.58 | 0.98 | 0.89 | 1.32 | 0.53  |
| 1871.00 | 12.03 | 0.91 | 1.16 | 1.67 | 0.64  |
| 1870.00 | 7.87  | 1.09 | 0.64 | 1.15 | 0.78  |
| 1869.00 | 9.51  | 1.00 | 0.90 | 0.51 | 0.20  |
| 1868.00 | 13.33 | 0.97 | 0.56 | 0.62 | 0.34  |
| 1867.00 | 7.59  | 1.52 | 0.72 | 0.73 | 1.01  |
| 1866.00 | 9.60  | 0.89 | 0.47 | 0.81 | 0.46  |
| 1865.00 | 13.54 | 1.05 | 0.50 | 0.94 | 0.63  |
| 1864.00 | 14.31 | 0.66 | 0.51 | 0.43 | 0.26  |
| 1863.00 | 14.76 | 1.15 | 0.73 | 0.78 | 0.59  |
| 1862.00 | 9.67  | 1.16 | 0.96 | 0.80 | 1.76  |
| 1861.00 | 15.02 | 0.88 | 0.77 | 0.82 | 0.38  |
| 1860.00 | 12.53 | 0.91 | 0.68 | 0.84 | 0.42  |
| 1859.00 | 14.13 | 0.78 | 0.73 | 0.86 | 0.35  |
| 1858.00 | 11.76 | 0.96 | 0.83 | 0.94 | 0.38  |
| 1857.00 | 11.26 | 0.78 | 0.57 | 0.54 | 0.11  |
| 1856.00 | 13.77 | 1.12 | 0.95 | 1.04 | 0.39  |
| 1855.00 | 12.33 | 0.80 | 1.16 | 1.38 | 0.35  |
| 1854.00 | 12.70 | 0.82 | 0.46 | 0.67 | 0.34  |
| 1853.00 | 9.93  | 1.14 | 0.75 | 0.66 | 0.38  |
| 1852.00 | 10.68 | 0.88 | 0.57 | 0.58 | 0.32  |
| 1851.00 | 8.35  | 0.73 | 0.61 | 0.57 | 0.15  |
| 1850.00 | 10.51 | 0.82 | 0.54 | 0.51 | 0.26  |
| 1849.00 | 14.19 | 0.68 | 0.47 | 0.34 | -0.01 |
| 1848.00 | 13.35 | 0.80 | 0.47 | 0.57 | 0.39  |
| 1847.00 | 10.31 | 0.75 | 0.39 | 0.38 | 0.23  |

|         |       |      |      |      |       |
|---------|-------|------|------|------|-------|
| 1846.00 | 13.39 | 0.96 | 0.64 | 0.30 | 0.17  |
| 1845.00 | 13.92 | 0.79 | 0.69 | 0.33 | 0.22  |
| 1844.00 | 11.40 | 0.79 | 0.97 | 0.61 | 0.17  |
| 1843.00 | 10.00 | 1.10 | 0.60 | 0.31 | 0.36  |
| 1842.00 | 11.81 | 0.90 | 0.65 | 0.29 | -0.17 |
| 1841.00 | 13.85 | 0.81 | 0.56 | 0.35 | 0.10  |
| 1840.00 | 12.47 | 0.90 | 0.46 | 0.39 | 0.19  |
| 1839.00 | 16.06 | 0.79 | 0.44 | 0.47 | 0.25  |
| 1838.00 | 11.66 | 1.04 | 0.55 | 0.63 | 0.41  |
| 1837.00 | 14.99 | 0.71 | 0.72 | 0.67 | 0.38  |
| 1836.00 | 8.28  | 0.84 | 1.99 | 1.10 | 0.52  |
| 1835.00 | 13.12 | 0.87 | 1.19 | 1.54 | 0.47  |
| 1834.00 | 13.22 | 0.84 | 0.43 | 0.87 | 0.57  |
| 1833.00 | 10.19 | 0.92 | 0.72 | 1.05 | 0.40  |
| 1832.00 | 15.33 | 0.89 | 2.49 | 1.34 | 0.39  |
| 1831.00 | 11.80 | 0.91 | 0.99 | 1.64 | 0.72  |
| 1830.00 | 17.36 | 0.93 | 0.67 | 1.18 | 0.60  |
| 1829.00 | 14.89 | 0.80 | 0.68 | 0.96 | 0.40  |
| 1828.00 | 11.40 | 0.92 | 0.53 | 0.90 | 0.53  |
| 1827.00 | 16.84 | 1.07 | 0.39 | 1.01 | 0.70  |
| 1826.00 | 13.74 | 1.00 | 0.38 | 0.89 | 0.68  |
| 1825.00 | 16.30 | 0.92 | 0.37 | 0.91 | 0.74  |
| 1824.00 | 15.00 | 0.94 | 0.59 | 1.05 | 0.62  |
| 1823.00 | 15.70 | 1.03 | 0.70 | 1.09 | 0.54  |
| 1822.00 | 19.97 | 1.00 | 0.60 | 0.82 | 0.56  |
| 1821.00 | 16.79 | 1.20 | 0.56 | 0.43 | 0.74  |
| 1820.00 | 18.00 | 1.01 | 0.47 | 0.75 | 0.66  |
| 1819.00 | 17.72 | 1.14 | 0.58 | 0.49 | 0.65  |
| 1818.00 | 12.15 | 1.35 | 0.79 | 0.93 | 0.73  |
| 1817.00 | 12.15 | 1.32 | 1.21 | 1.55 | 0.71  |
| 1816.00 | 12.15 | 1.08 | 4.07 | 1.56 | 0.40  |
| 1815.00 | 16.65 | 1.23 | 1.44 | 1.56 | 0.69  |
| 1814.00 | 16.65 | 0.91 | 0.93 | 0.43 | 0.25  |
| 1813.00 | 16.17 | 1.05 | 0.81 | 0.55 | -0.44 |
| 1812.00 | 14.39 | 0.91 | 0.68 | 0.67 | 0.35  |
| 1811.00 | 14.95 | 1.05 | 0.88 | 0.76 | 0.29  |
| 1810.00 | 12.15 | 1.31 | 2.75 | 1.47 | -0.67 |
| 1809.00 | 12.15 | 0.99 | 1.29 | 0.18 | -0.45 |
| 1808.00 | 12.15 | 0.82 | 0.45 | 0.61 | 0.13  |
| 1807.00 | 13.41 | 0.87 | 0.37 | 0.82 | 0.45  |
| 1806.00 | 13.41 | 0.79 | 0.47 | 1.03 | 0.72  |
| 1805.00 | 14.22 | 1.26 | 0.53 | 1.51 | 1.18  |
| 1804.00 | 12.02 | 1.09 | 0.54 | 0.94 | 0.72  |



|         |       |      |      |      |      |
|---------|-------|------|------|------|------|
| 1803.00 | 13.43 | 0.82 | 0.45 | 1.00 | 0.64 |
| 1802.00 | 11.40 | 0.97 | 0.47 | 0.97 | 0.73 |
| 1801.00 | 16.77 | 0.80 | 0.40 | 0.61 | 0.30 |
| 1800.00 | 15.80 | 0.93 | 0.55 | 0.71 | 0.58 |
| 1799.00 | 13.49 | 0.83 | 0.39 | 0.69 | 0.61 |
| 1798.00 | 15.83 | 0.86 | 0.49 | 0.87 | 0.51 |
| 1797.00 | 21.85 | 0.81 | 0.58 | 0.98 | 0.55 |
| 1796.00 | 16.71 | 0.78 | 0.57 | 0.71 | 0.44 |
| 1795.00 | 11.73 | 1.08 | 0.49 | 1.06 | 0.73 |
| 1794.00 | 10.21 | 1.37 | 0.48 | 0.20 | 1.02 |
| 1793.00 | 11.26 | 1.06 | 0.52 | 0.69 | 0.58 |
| 1792.00 | 14.73 | 0.93 | 0.57 | 0.33 | 0.38 |
| 1791.00 | 13.63 | 0.94 | 0.42 | 0.90 | 0.61 |
| 1790.00 | 13.18 | 0.97 | 0.58 | 0.74 | 0.43 |
| 1789.00 | 12.72 | 0.76 | 0.50 | 0.64 | 0.38 |
| 1788.00 | 11.99 | 0.97 | 0.46 | 0.98 | 0.71 |
| 1787.00 | 10.28 | 1.12 | 0.69 | 1.34 | 0.90 |
| 1786.00 | 12.15 | 0.85 | 0.53 | 0.70 | 0.35 |
| 1785.00 | 12.15 | 1.01 | 0.54 | 0.48 | 0.43 |
| 1784.00 | 12.15 | 1.24 | 8.56 | 1.40 | 1.04 |
| 1783.00 | 12.15 | 0.98 | 1.96 | 1.12 | 0.57 |
| 1782.00 | 11.52 | 0.77 | 0.43 | 0.84 | 0.63 |
| 1781.00 | 11.52 | 0.85 | 0.59 | 1.09 | 0.72 |
| 1780.00 | 10.49 | 0.64 | 0.52 | 0.87 | 0.46 |
| 1779.00 | 11.77 | 0.83 | 0.92 | 1.30 | 0.60 |
| 1778.00 | 13.04 | 1.67 | 0.55 | 1.48 | 1.20 |
| 1777.00 | 13.80 | 1.11 | 0.62 | 1.26 | 0.86 |
| 1776.00 | 12.15 | 0.76 | 0.43 | 0.82 | 0.58 |
| 1775.00 | 10.49 | 0.82 | 0.39 | 0.67 | 0.46 |
| 1774.00 | 11.56 | 1.05 | 0.53 | 0.77 | 0.44 |
| 1773.00 | 12.62 | 1.18 | 0.52 | 0.87 | 0.66 |
| 1772.00 | 12.75 | 0.98 | 0.48 | 0.67 | 0.58 |
